# Supplementary material for: Expression of pH-Sensitive TRPC4 in Common Skin Tumors
Source: MDPI journal article supplement (doi:10.3390/ijms24021037), 2023-01-05
Supplement: s1 [file s1]

## SUPPLEMENTARY INFORMATION

1

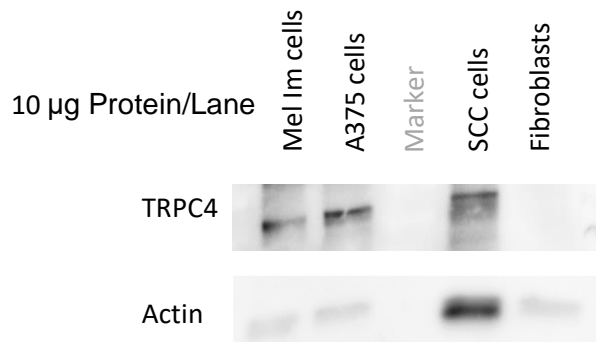

2

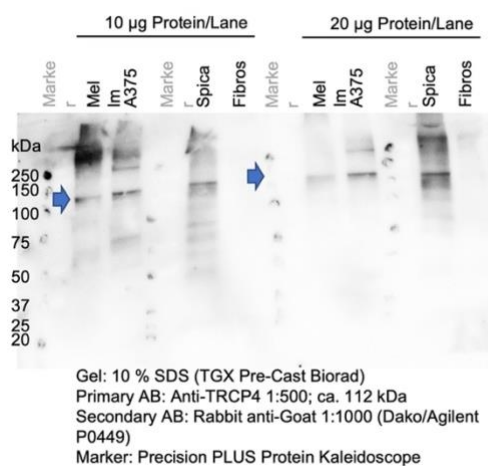

3

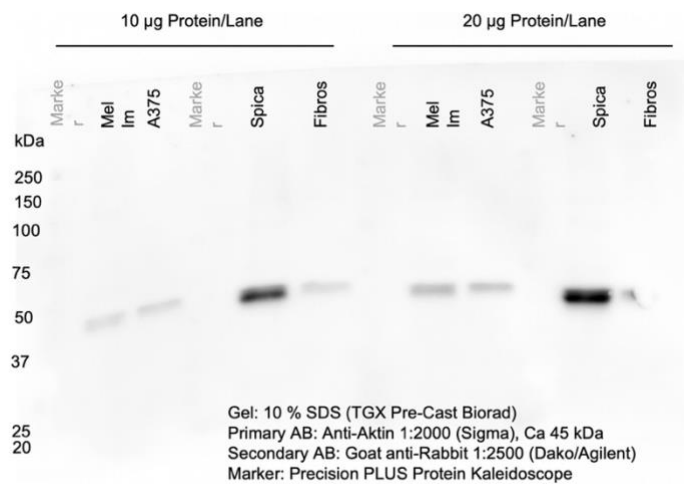

### Supplementary Figure S1: Western Blot of TRPC4 antibody.

**1** Determination of the specificity of the TRPC 4 antibody by western blot at a concentration of 10 µg per lane in Mel Im cells, A 375 cells, cells of squamous cell carcinoma (SCC), fibroblasts, in comparison to the housekeeper actin.

**2, 3** Determination of the specificity of the TRPC 4 antibody by western blot at a concentration of 10 µg and 20 per lane in Mel Im cells, A 375 cells, cells of squamous cell carcinoma (SCC), fibroblasts, in comparison to the housekeeper actin.

**Supplementary Figure S2-S4:** Immunohistochemistry for TRPC4 in BCC. Scale bars represent 200  $\mu$ m. In BCC, TRPC4 expression was weak positive for 16/39 samples (1, 3, 6, 8, 14, 15, 18, 19, 23, 24, 25, 30, 31, 33, 34, 35). 20/39 (2, 4, 5, 7, 9-13, 16, 17, 20, 26-28, 32, 36-39) showed a negative staining. 3/39 showed a strong positive reaction (21, 22, 29).

1 = A1M\_1S\_1, 2 = A1M\_2S\_1, 3 = A1M\_3S\_1, 4 = A1M\_4S\_1, 5 = A1M\_5S\_1, 6 = A1M\_6S\_1, 7 = A1M\_7S\_1, 8 = A1M\_8S\_1, 9 = A1M\_9S\_1, 10 = A1M\_10S\_1, 11 = , A1M\_11S\_1, 12 = A1M\_12S\_1, 13 = A1M\_16S\_1, 14 = A1M\_17S\_1, 15 = A1M\_18S\_1, 16 = A2M\_1S\_1, 17 = A2M\_3S\_1, 18 = A2M\_4S\_1, 19 = A2M\_5S\_1, 20 = A2M\_6S\_1, 21 = A2M\_9S\_1, 22 = A2M\_11S\_1, 23 = A2M\_12S\_1, 24 = A2M\_13S\_1, 25 = A2M\_14S\_1, 26 = A2M\_18S\_1, 27 = A2M\_20S\_1, 28 = A3M\_1S\_1, 29 = A3M\_3S\_1, 30 = A3M\_4S\_1, 31 = A3M\_7S\_1, 32 = A3M\_10S\_1, 33 = A3M\_11S\_1, 34 = A3M\_12S\_1, 35 = A3M\_13S\_1, 36 = A3M\_14S\_1, 37 = A3M\_15S\_1, 38 = A3M\_16S\_1, 39 = A3M\_17S\_1

**Supplementary Figure S2:** Immunohistochemistry for TRPC4 in BCC (part 1)

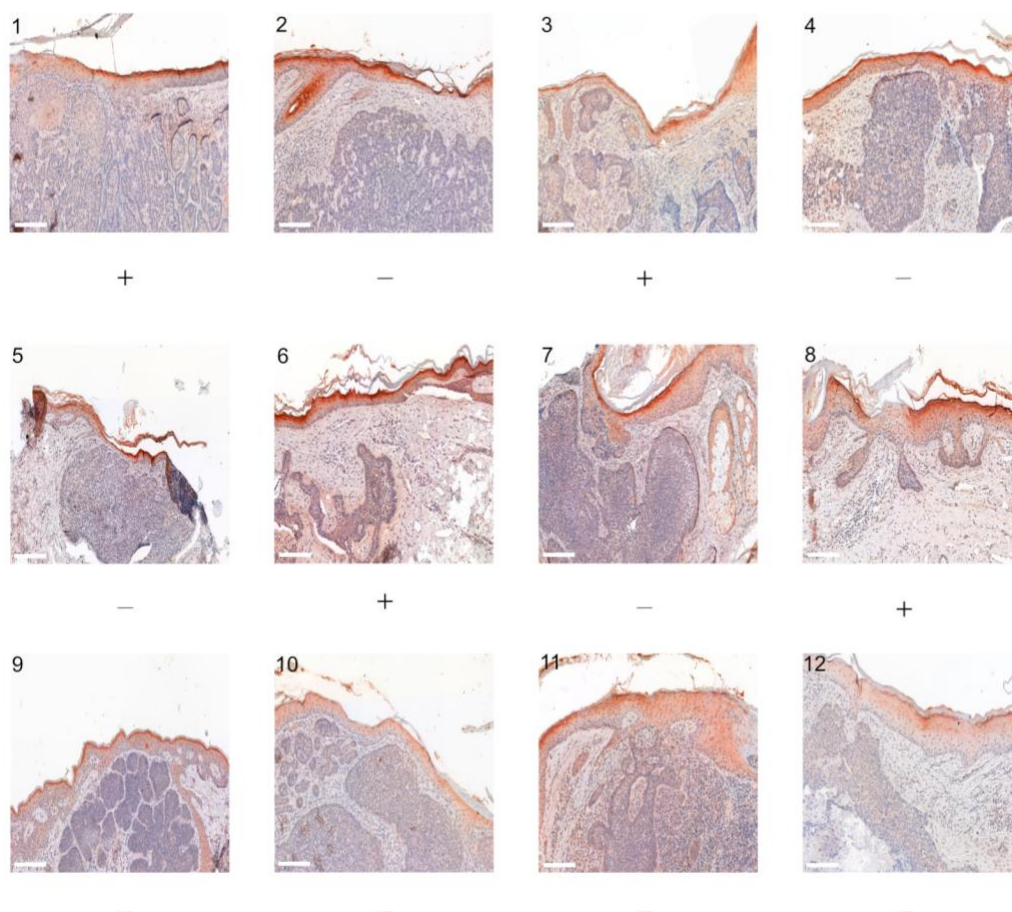

**Supplementary Figure S3:** Immunohistochemistry for TRPC4 in BCC (part 2)

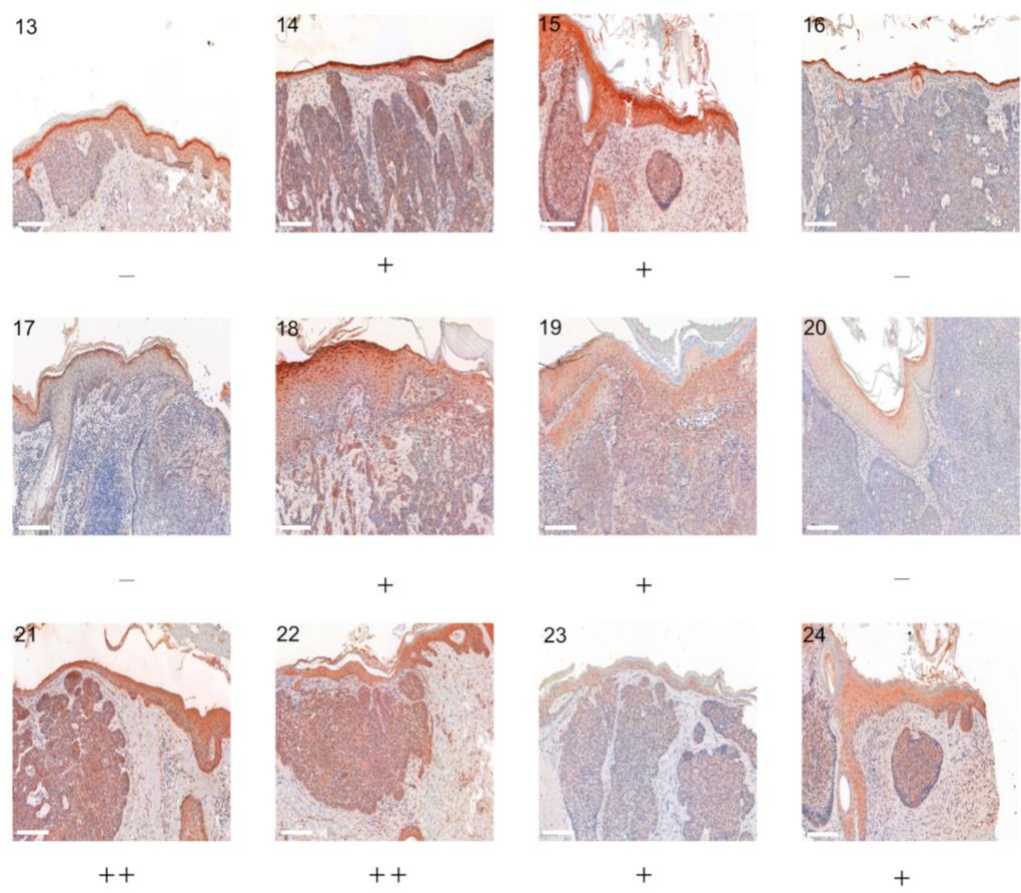

**Supplementary Figure S4:** Immunohistochemistry for TRPC4 in BCC (part 3)

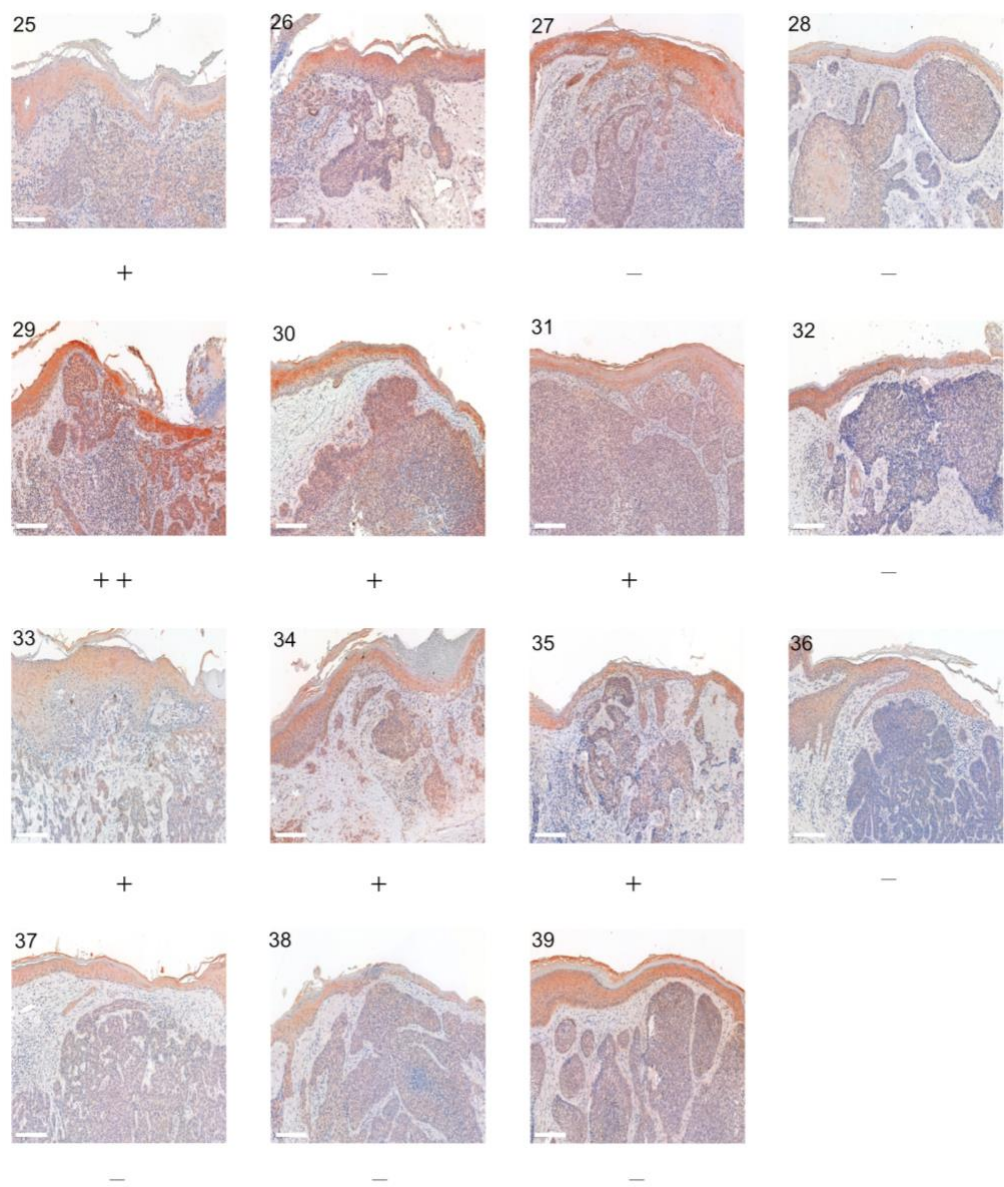



**Supplementary Figure S5-S7:** Immunohistochemistry for TRPC4 in SCC. Scale bars represent 200  $\mu$ m. SCC showed a rather homogeneous expression in all 25 samples (1-27), displaying a weak positive reaction.

1= A3M\_19S\_1, 2= A3M\_20S\_1, 3= A4M\_1S\_1, 4= A4M\_3S\_1, 5= A4M\_4S\_1, 6= A4M\_7S\_1, 7= A4M\_8S\_1, 8= A4M\_10S\_1, 9= A4M\_12S\_1, 10= A4M\_15S\_1, 11= A4M\_16S\_1, 12= A4M\_17S\_1, 13= A4M\_18S\_1, 14= A4M\_19S\_1, 15= A5M\_1S\_1, 16= A5M\_2S\_1, 17= A5M\_5S\_1, 18= A5M\_6S\_1, 19= A5M\_9S\_1, 20= A5M\_11S\_1, 21= A5M\_12S\_1, 22= A5M\_14S\_1, 23= A5M\_16S\_1, 24= A5M\_17S\_1, 25= A5M\_18S\_1, 26= A5M\_19S\_1, 27= A5M\_20S\_1

**Supplementary Figure S5** Immunohistochemistry for TRPC4 in SCC (part 1)

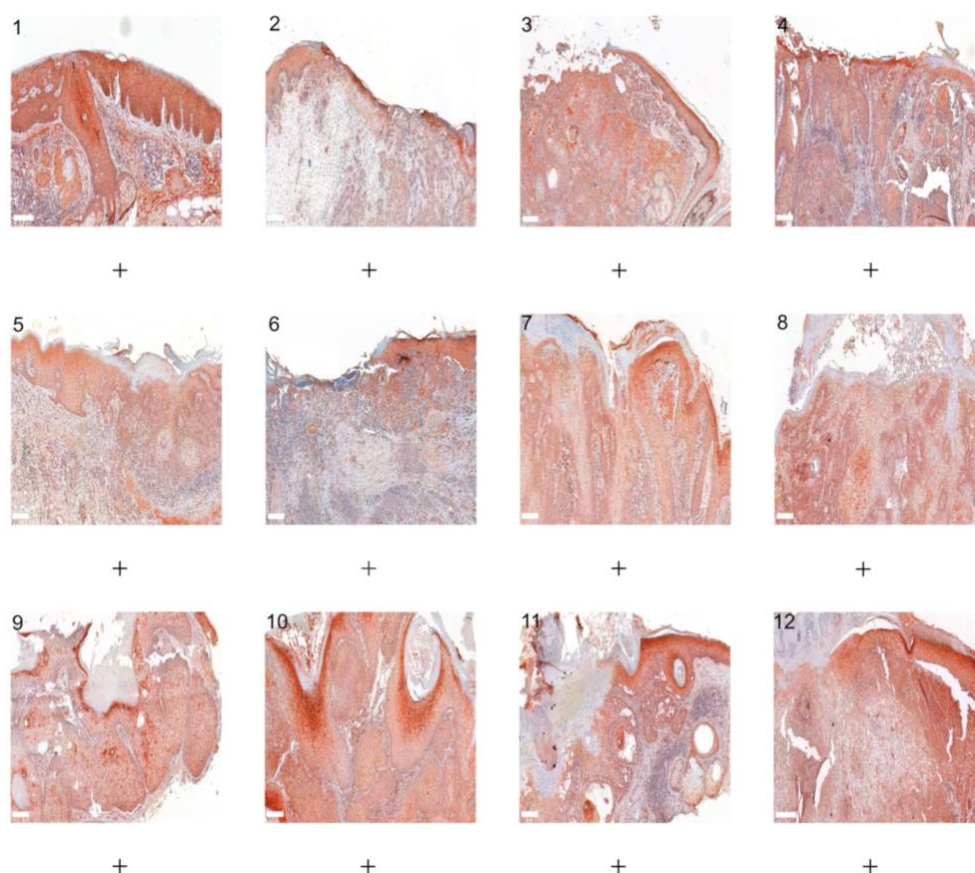

**Supplementary Figure S6** Immunohistochemistry for TRPC4 in SCC (part 2)

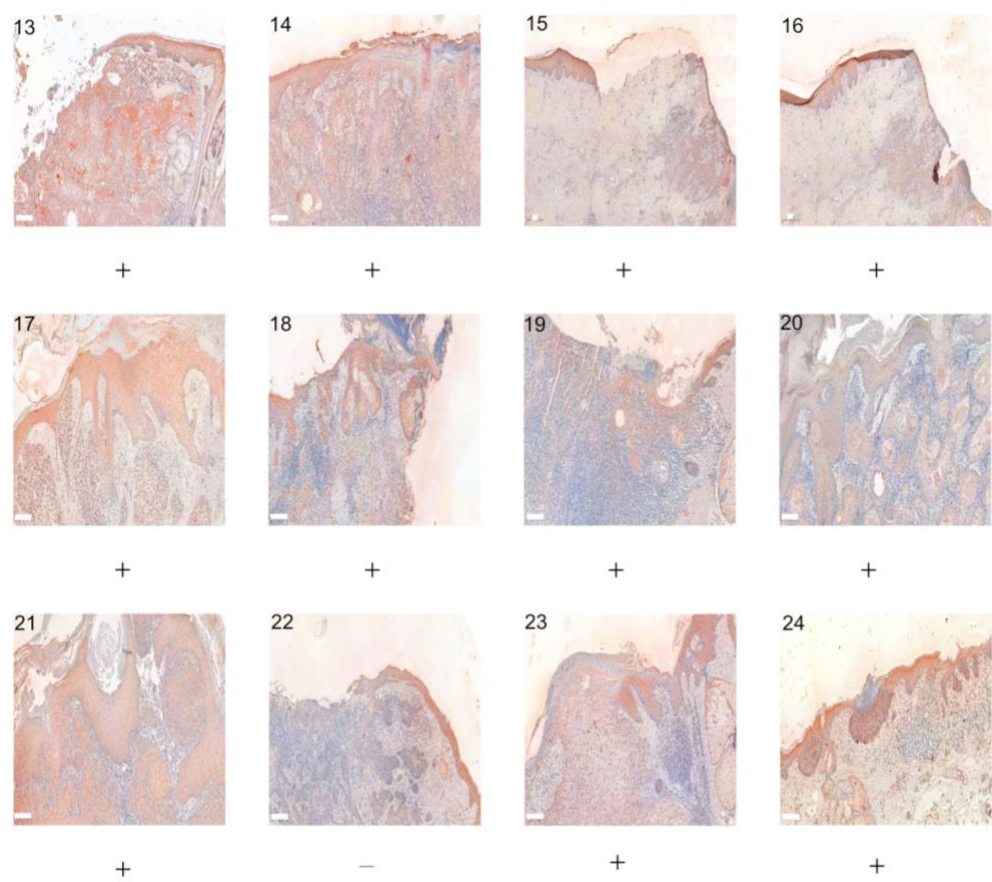

**Supplementary Figure S7** Immunohistochemistry for TRPC4 in SCC (part 3)

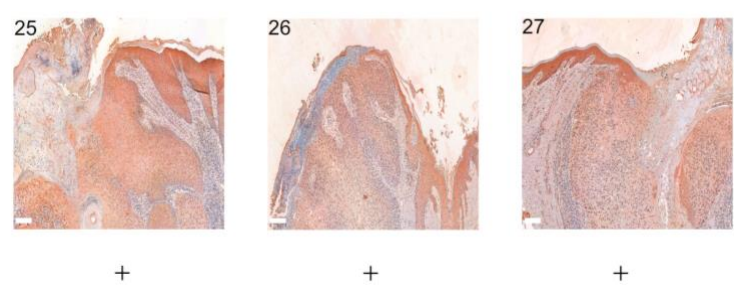

**Supplementary Figure S8:** Immunohistochemistry for TRPC4 in NCN. Scale bars represent 200  $\mu$ m. In epidermal parts, 10/13 showed a weak positive reaction for TRPC4 (2, 3, 4, 5, 6, 8, 10, 12, 13, 15), 1/13 reacted strong positive (9), and 2/13 (7,14) displayed a weak staining. The dermal portion showed a weak positive expression of TRPC4 in 11/13 (2, 3, 4, 5, 6, 8, 9, 10, 11, 12, 13). For number 7 and 13, a decreasing expression towards deeper tissue levels can be observed.

1= NZN TRPC4 27-11, 2= NZN TRPC4 30-11, 3= NZN TRPC4 30-11\_24-9-2021\_16-00-41, 4= NZN TRPC4 41-11, 5= NZN TRPC4 101-11, 6= NZN TPC4 109-11 2, 7= K. NZN TRPC4 117-11, 8= K. NZN TRPC4 121-11, 9= K. NZN TRPC4 122-11, 10= K. NZN TRPC4 265-11, 11= K. NZN TRPC4 496- 11, 12= K. NZN TRPC4 1496- 11, 13= K. NZN TRPC4 9629- 09, 14= K. NZN TRPC4 16892- 09, 15= K. NZN TRPC4 29215- 0

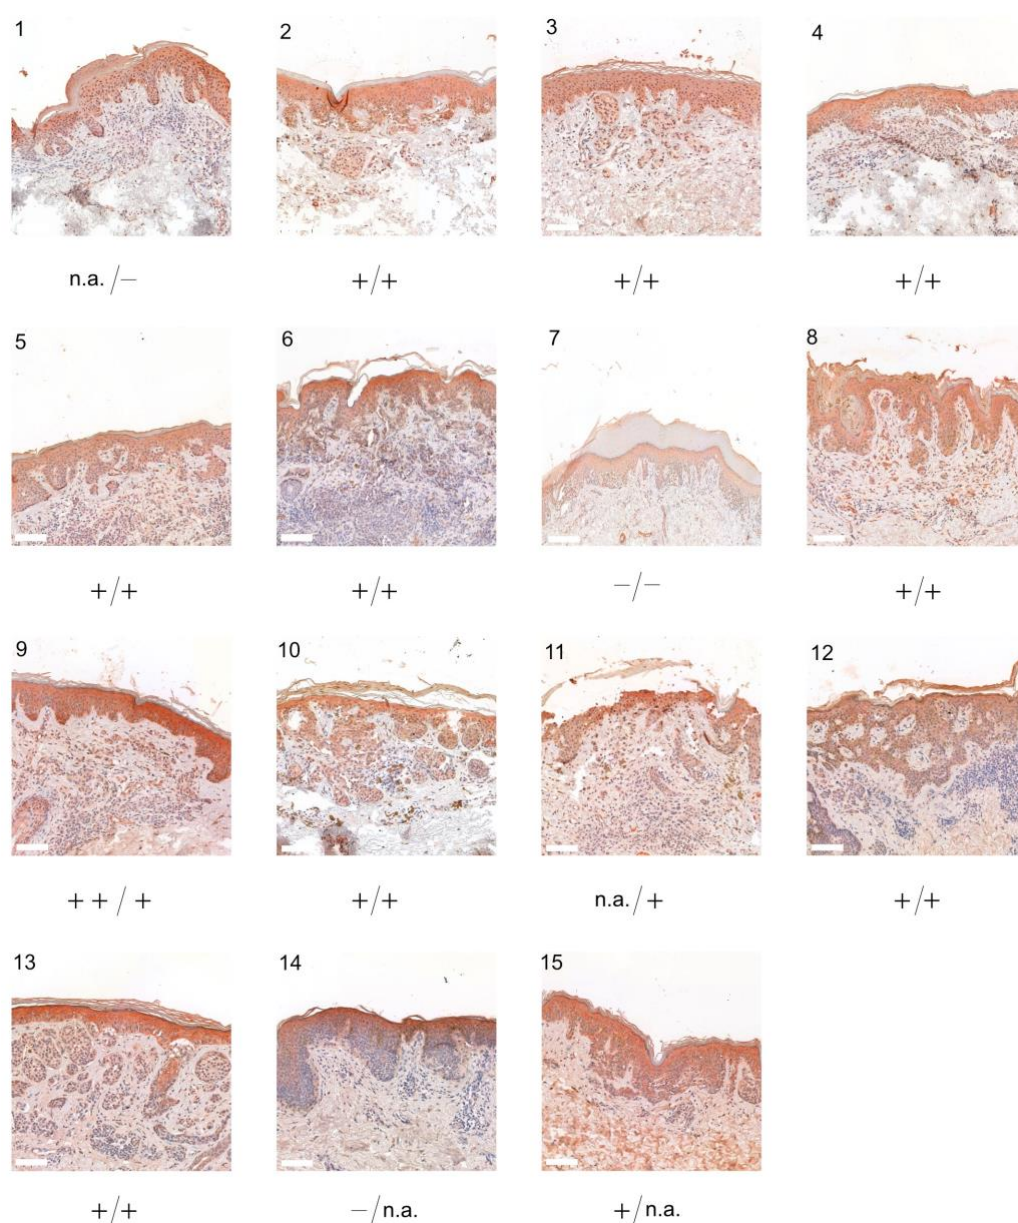



**Supplementary Figure S9:** Immunohistochemistry for TRPC4 in MM. Scale bars represent 200  $\mu$ m. 12/13 of the epidermal and dermal sections were weak positive for TRPC4 (1-12), whereas 1/13 of showed a strong positive epidermal and negative dermal staining reaction (13).

1= MM TRPC4 1043-11, 2= MM TRPC4 1730- 11, 3= MM TRPC4 1903-11, 4= MM TRPC4 1944-11, 5= MM TRPC4 2013-11, 6= MM TRPC4 2017-11, 7= MM TRPC4 2125- 11, 8= MM TRPC4 2668- 09, 9= MM TRPC4 7060- 09, 10= MM TRPC4 7104- 09, 11= MM TRPC4 7677- 09, 12= MM TRPC4 7802- 09, 13= MM TRPC4 7439-09

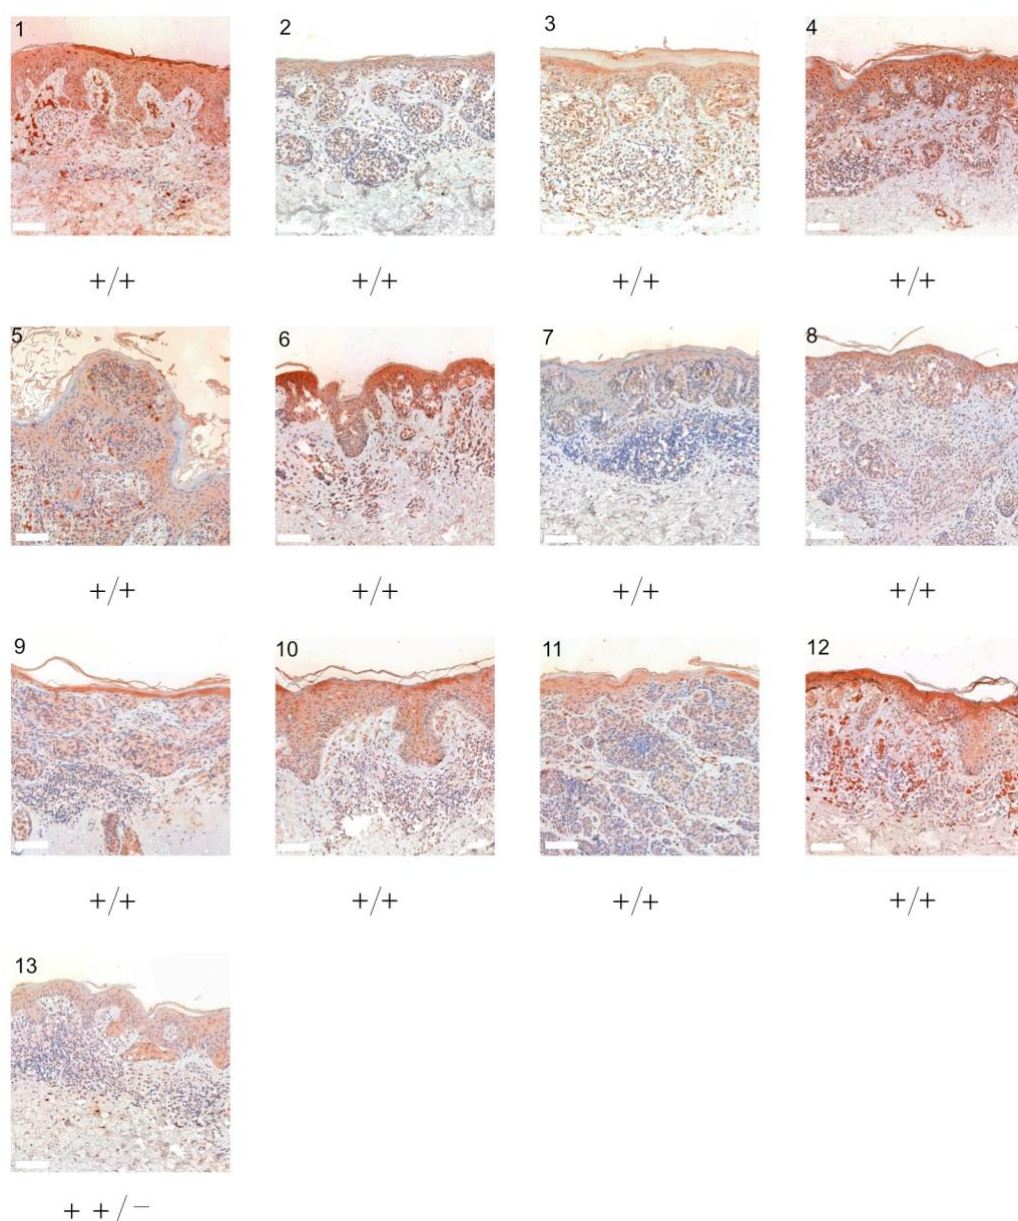



Supplementary Figure S10: TRPC4 mutation frequency in MM from cBioportal.org

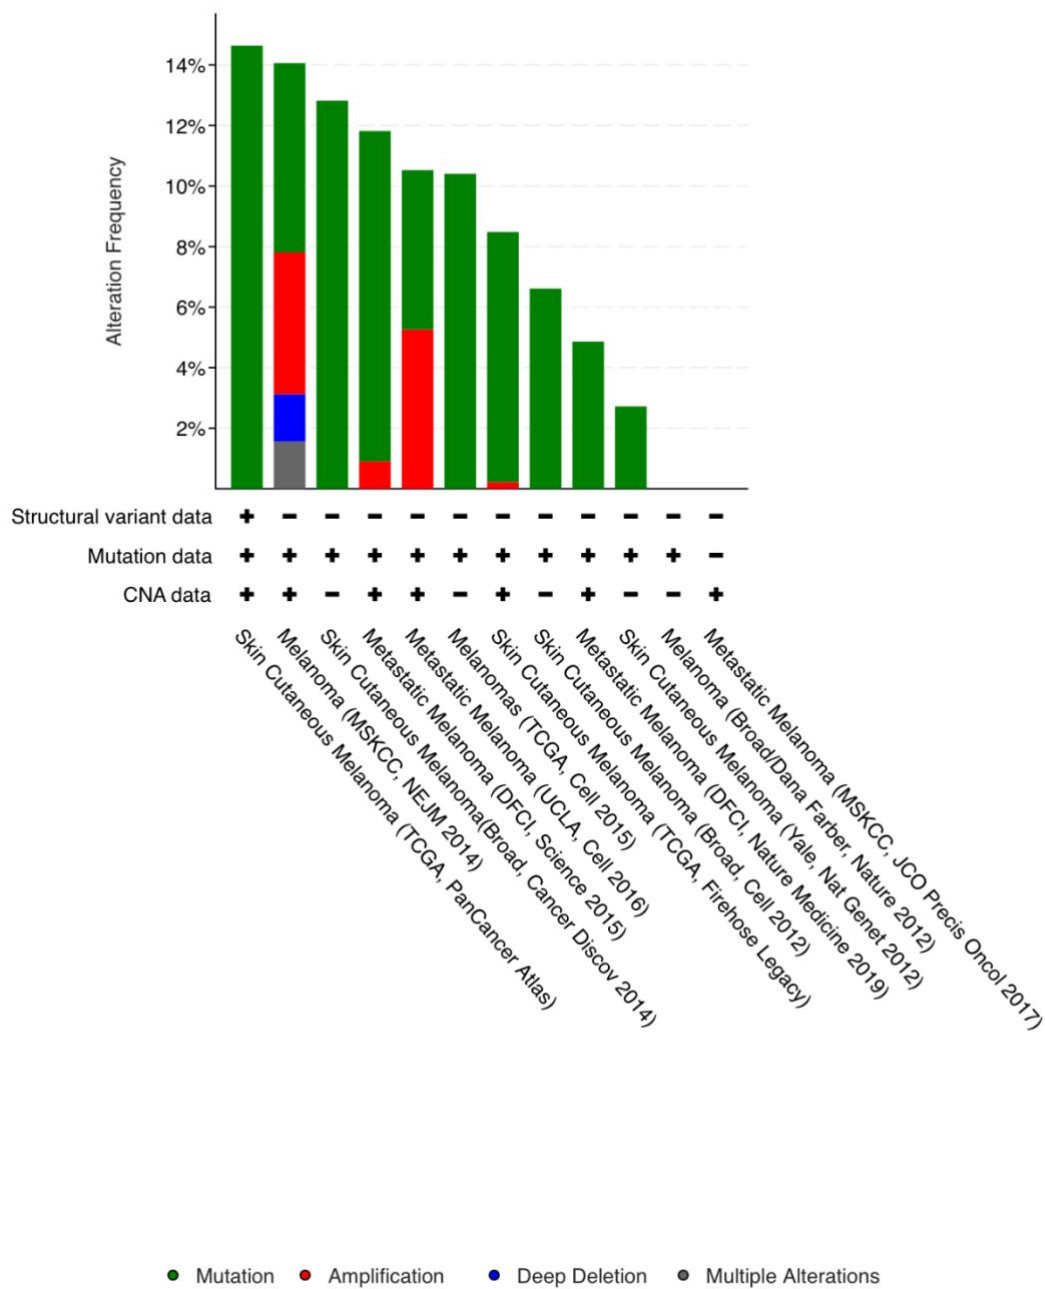

**Supplementary Figure S11:** TRPC 4 Mutation frequency in non-melanoma skin cancer from cBioportal.org

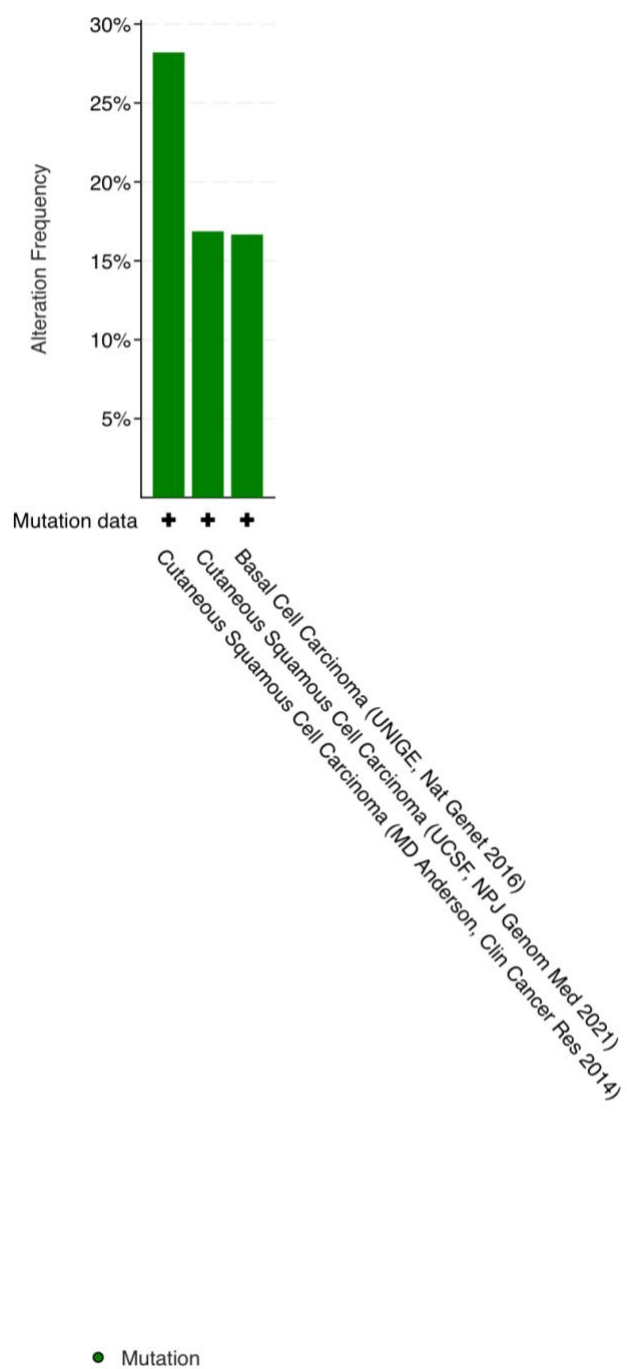

**Supplementary Table S1:** Scoring results for TRPC4 in BCC

| Number    | Type of BCC                  | Scoring |
|-----------|------------------------------|---------|
| A1M_1S_1  | nodular                      | +       |
| A1M_2S_1  | nodular                      | -       |
| A1M_3S_1  | nodular                      | +       |
| A1M_4S_1  | nodular                      | -       |
| A1M_6S_1  | nodular                      | -       |
| A1M_7S_1  | nodular                      | +       |
| A1M_8S_1  | nodular                      | -       |
| A1M_9S_1  | superficial                  | +       |
| A1M_11S_1 | nodular                      | -       |
| A1M_12S_1 | nodular                      | -       |
| A1M_13S_1 | nodular                      | -       |
| A1M_15S_1 | nodular                      | -       |
| A1M_16S_1 | superficial                  | -       |
| A1M_17S_1 | nodular                      | +       |
| A1M_18S_1 | superficial                  | +       |
| A2M_1S_1  | nodular                      | -       |
| A2M_3S_1  | nodular                      | -       |
| A2M_4S_1  | sclerosing                   | +       |
| A2M_5S_1  | nodular / sclerosing (mixed) | +       |
| A2M_6S_1  | nodular                      | -       |
| A2M_9S_1  | nodular                      | ++      |
| A2M_11S_1 | nodular                      | ++      |
| A2M_12S_1 | nodular                      | +       |
| A2M_13S_1 | nodular                      | +       |
| A2M_14S_1 | nodular / sclerosing (mixed) | +       |
| A2M_18S_1 | nodular / sclerosing (mixed) | -       |
| A2M_20S_1 | nodular                      | -       |
| A3M_1S_1  | nodular                      | -       |
| A3M_3S_1  | nodular                      | ++      |
| A3M_4S_1  | nodular                      | +       |
| A3M_7S_1  | nodular                      | +       |
| A3M_10S_1 | nodular                      | -       |
| A3M_11S_1 | nodular / sclerosing (mixed) | +       |
| A3M_12S_1 | nodular / sclerosing (mixed) | +       |
| A3M_13S_1 | nodular / sclerosing (mixed) | +       |
| A3M_14S_1 | nodular                      | -       |
| A3M_15S_1 | nodular                      | -       |
| A3M_16S_1 | nodular                      | -       |
| A3M_17S_1 | nodular                      | -       |



**Supplementary Table S2:** Scoring results for TRPC4 in SCC

| Number    | Scoring |
|-----------|---------|
| A3M_19S_1 | +       |
| A3M_20S_1 | +       |
| A4M_1S_1  | +       |
| A4M_3S_1  | +       |
| A4M_4S_1  | +       |
| A4M_7S_1  | +       |
| A4M_8S_1  | +       |
| A4M_10S_1 | +       |
| A4M_12S_1 | +       |
| A4M_15S_1 | +       |
| A4M_16S_1 | +       |
| A4M_17S_1 | +       |
| A4M_18S_1 | +       |
| A4M_19S_1 | +       |
| A5M_1S_1  | +       |
| A5M_2S_1  | +       |
| A5M_5S_1  | +       |
| A5M_6S_1  | +       |
| A5M_9S_1  | +       |
| A5M_11S_1 | +       |
| A5M_12S_1 | +       |
| A5M_14S_1 | -       |
| A5M_16S_1 | +       |
| A5M_17S_1 | +       |
| A5M_18S_1 | +       |
| A5M_19S_1 | +       |
| A5M_20S_1 | +       |

**Supplementary Table S3:** Scoring results for TRPC4 in NCN

| Number                             | Type of NCN | Scoring Epidermal | Scoring Dermal |
|------------------------------------|-------------|-------------------|----------------|
| NZN TRPC4 27-11                    | dermal      | n/a               | -              |
| NZN TRPC4 30-11                    | compound    | +                 | +              |
| NZN TRPC4 30-11_24-9-2021_16-00-41 | compound    | +                 | +              |
| NZN TRPC4 41-11                    | compound    | +                 | +              |
| NZN TRPC4 101-11                   | compound    | +                 | +              |
| NZN TPC4 109-11 2                  | compound    | +                 | +              |
| K. NZN TRPC4 117-11                | compound    | -                 | -              |
| K. NZN TRPC4 121-11                | compound    | +                 | +              |
| K. NZN TRPC4 122-11                | compound    | ++                | +              |
| K. NZN TRPC4 265-11                | compound    | +                 | +              |
| K. NZN TRPC4 496- 11               | dermal      | n/a               | +              |
| K. NZN TRPC4 1496- 11              | compound    | +                 | +              |
| K. NZN TRPC4 9629- 09              | compound    | +                 | +              |
| K. NZN TRPC4 16892- 09             | junctional  | -                 | n/a            |
| K. NZN TRPC4 29215- 09             | junctional  | +                 | n/a            |

**Supplementary Table S4:** Scoring results for TRPC4 in MM

| Number            | Scoring epidermal | Scoring dermal |
|-------------------|-------------------|----------------|
| MM TRPC4 1043-11  | +                 | +              |
| MM TRPC4 1730- 11 | +                 | +              |
| MM TRPC4 1903-11  | +                 | +              |
| MM TRPC4 1944-11  | +                 | +              |
| MM TRPC4 2013-11  | +                 | +              |
| MM TRPC4 2017-11  | +                 | +              |
| MM TRPC4 2125- 11 | +                 | +              |
| MM TRPC4 2668- 09 | +                 | +              |
| MM TRPC4 7060- 09 | +                 | +              |
| MM TRPC4 7104- 09 | +                 | +              |
| MM TRPC4 7677- 09 | +                 | +              |
| MM TRPC4 7802- 09 | +                 | +              |
| MM TRPC4 7439-09  | ++                | -              |



**Supplementary Table S5: Statistical analysis of TRPC4– comparison of all entities**

|               |             | Scoring |        |      | total |
|---------------|-------------|---------|--------|------|-------|
|               |             | -       | +      | ++   |       |
| SCC           | number      | 0       | 25     | 0    | 25    |
|               | % of tumors | 0%      | 100.0% | 0%   | 100%  |
| BCC           | number      | 20      | 16     | 3    | 39    |
|               | % of tumors | 51.3%   | 41.0%  | 7.7% | 100%  |
| NCN epidermal | number      | 2       | 10     | 1    | 13    |
|               | % of tumors | 15.4%   | 76.9%  | 7.7% | 100%  |
| NCN dermal    | number      | 2       | 11     | 0    | 13    |
|               | % of tumors | 15.4%   | 84.6%  | 0%   | 100%  |
| MM epidermal  | number      | 0       | 12     | 1    | 13    |
|               | % of tumors | 0%      | 92.3%  | 7.7% | 100%  |
| MM dermal     | number      | 1       | 12     | 0    | 13    |
|               | % of tumors | 7.7%    | 92.3%  | 0%   | 100%  |
| Gesamt        | number      | 25      | 86     | 5    | 116   |
|               | % of tumors | 21.6%   | 74.1%  | 4.3% | 100%  |

**Supplementary Table S6: NCBI Geo gene expression analysis of TRPC4****BCC vs. SCC: Study GSE53462**

| ID           | adj.P.Val | P.Value  | t          | B        | logFC       | Gene.symbol | Gene.title                                                       |
|--------------|-----------|----------|------------|----------|-------------|-------------|------------------------------------------------------------------|
| ILMN_1782295 | 0.945847  | 8.35e-01 | -0.2115083 | -6.17258 | -0.01273726 | TRPC4       | transient receptor potential cation channel subfamily C member 4 |

**NCN cs. MM: Study GSE4587**

| ID          | adj.P.Val | P.Value    | t          | B        | logFC      | Gene.symbol | Gene.title                                                       |
|-------------|-----------|------------|------------|----------|------------|-------------|------------------------------------------------------------------|
| 224220_x_at | 0.2202    | 0.04481366 | -2.2047613 | -3.9612  | -1.3656916 | TRPC4       | transient receptor potential cation channel subfamily C member 4 |
| 220818_s_at | 0.5408    | 0.27021535 | -1.1482785 | -5.41951 | -0.8524036 | TRPC4       | transient receptor potential cation channel subfamily C member 4 |
| 224219_s_at | 0.9163    | 0.80658083 | 0.2495519  | -6.02526 | 0.2283259  | TRPC4       | transient receptor potential cation channel subfamily C member 4 |
| 220817_at   | 581       | 0.31098903 | -1.051415  | -5.51844 | -0.8847788 | TRPC4       | transient receptor potential cation channel subfamily C member 4 |

**NCN cs. MM: Study GSE12391**

| ID    | adj.P.Val | P.Value  | t         | B          | logFC      | Gene.symbol | Gene.title                                                       |
|-------|-----------|----------|-----------|------------|------------|-------------|------------------------------------------------------------------|
| 19602 | 6.09e-01  | 3.72e-01 | 0.8958235 | -6.0441039 | 0.01984097 | TRPC4       | transient receptor potential cation channel subfamily C member 4 |

**NCN cs. MM: Study GSE46517**

| ID          | adj.P.Val | P.Value  | t        | B         | logFC     | Gene.symbol | Gene.title                                                       |
|-------------|-----------|----------|----------|-----------|-----------|-------------|------------------------------------------------------------------|
| 220817_at   | 6.26e-01  | 3.18e-01 | 1.010048 | -5.803297 | 0.3355734 | TRPC4       | transient receptor potential cation channel subfamily C member 4 |
| 220818_s_at | 9.58e-01  | 8.75e-01 | 0.158867 | -6.289573 | 0.0550281 | TRPC4       | transient receptor potential cation channel subfamily C member 4 |

**NCN cs. MM: Study GSE114445**

| ID          | adj.P.Val  | P.Value  | t         | B          | logFC       | Gene.symbol | Gene.title                                                       |
|-------------|------------|----------|-----------|------------|-------------|-------------|------------------------------------------------------------------|
| 220818_s_at | 0.25245972 | 7.80e-02 | -1.828659 | -4.7264186 | -0.11600316 | TRPC4       | transient receptor potential cation channel subfamily C member 4 |
| 224220_x_at | 0.25438021 | 7.90e-02 | -1.822226 | -4.7368991 | -0.13412296 | TRPC4       | transient receptor potential cation channel subfamily C member 4 |
| 220817_at   | 0.30558838 | 1.09e-01 | -1.656632 | -4.9965644 | -0.10672587 | TRPC4       | transient receptor potential cation channel subfamily C member 4 |

NCN cs. MM: Study GSE183115

| ID                  | adj.P.Val | P.Value    | t         | B        | logFC     | Gene.symbol | Gene.title                                                       |
|---------------------|-----------|------------|-----------|----------|-----------|-------------|------------------------------------------------------------------|
| ADXECADA.22327_s_at | 919       | 0.29257616 | 1.11      | -5.20838 | 1.23e-01  | TRPC4       | transient receptor potential cation channel subfamily C member 4 |
| ADXECNTDJ.362_s_at  | 963       | 0.58561657 | -5.64e-01 | -5.6313  | -5.93e-02 | TRPC4       | transient receptor potential cation channel subfamily C member 4 |
